# Supplementary material for: Manipulation of Alcohol and Short-Chain Fatty Acids in the Metabolome of Commensal and Virulent Klebsiella pneumoniae by Linolenic Acid
Source: MDPI journal article supplement (doi:10.3390/microorganisms8050773), 2020-05-21
Supplement: s1 [file s1]

Supplementary Material

Brief Report

# Manipulation of Alcohol and Short-chain Fatty Acids in the Metabolome of Commensal and Virulent *Klebsiella pneumoniae* by Linolenic Acid

Ryan Yuki Huang<sup>1,2</sup>, Deron Raymond Herr<sup>3</sup>, and Shabbir Moochhala<sup>3\*</sup>

<sup>1</sup> Canyon Crest Academy, San Diego, 92130, CA, USA.

<sup>2</sup> Department of Mechanical and Aerospace Engineering, University of California, San Diego, 92093, CA, USA.

<sup>3</sup> Department of Pharmacology, National University of Singapore, 117600, Singapore.

\*Reprint requests to: Dr. Shabbir Moochhala, National University of Singapore, Singapore.

E-mail: E-mail: phcsmm@nus.edu.sg

Tel: +65-8511-0112

AGATGCGCAGCTACACATGCAGTCGAGCGGTAGCACAGAGAGCTTGCTCTCGGGTGACGAGCGG  
CGGACGGGTGAGTAATGTCTGGGAAACTGCCTGATGGAGGGGGATAACTACTGGAAACGGTAGC  
TAATACCGCATAATGTCGCAAGACCAAAGTGGGGGACCTTCGGGCCTCATGCCATCAGATGTGC  
CCAGATGGGATTAGCTAGTAGGTGGGGTAATGGCTCACCTAGGCGACGATCCCTAGCTGGTCTGA  
GAGGATGACCAGCCACACTGGAAGTGAAGACACGGTCCAGACTCCTACGGGAGGCAGCAGTGGG  
GAATATTGCACAATGGGCGCAAGCCTGATGCAGCCATGCCGCGTGTGTGAAGAAGGCCTTCGGG  
TTGTAAAGCACTTTCAGCGGGGAGGAAGGCGATAAGGTTAATAACCTTGTCGATTGACGTTACCC  
GCAGAAGAAGCACCGGCTAACTCCGTGCCAGCAGGGCCGGGTAATAGA

**Figure S1.** 16S ribosomal RNA (rRNA) sequence of human isolates of *K. pneumoniae* using the 16S rRNA forward (F) 5'-GAG TTT GAT CCT GGC TCA-3' and reverse (R) 5'-ACG GCT AAC TTG TTA CGA CT-3' primers.
